# Supplementary material for: Growth of close-packed crystalline polypyrrole on graphene oxide via in situ polymerization of two-monomer-connected precursors
Source: Royal Society of Chemistry journal article supplement (doi:10.1039/c9nr05398k), 2019-01-01
Supplement: c9nr05398k1.pdf [file c9nr05398k1.pdf]

**Electronic Supplementary Information (ESI) for**

**Growth of Close-Packed Crystalline Polypyrrole on Graphene Oxide via *in situ* Polymerization of Two-Monomer-Connected Precursor**

Wonbin Kim<sup>1,†</sup>, Hong-Joon Lee<sup>1,†</sup>, Zubair Ahmad<sup>1</sup>, Seung Jo Yoo<sup>2,3</sup>, Youn-Joong Kim<sup>2</sup>, Santosh Kumar<sup>1</sup>, Mohammad Changez<sup>1,4</sup>, Jung-Soo Lee<sup>5</sup> and Jae-Suk Lee<sup>1\*</sup>

<sup>1</sup>School of Materials Science and Engineering, Gwangju Institute of Science and Technology (GIST), 123 Cheomdangwagi-ro, Buk-gu, Gwangju 61005, Korea

<sup>2</sup>Electron Microscopy Research Center, Korea Basic Science Institute (KBSI), 169-148 Gwahak-ro, Yuseong-gu, Daejeon 34133, Korea.

<sup>3</sup>Department of Materials Science and Engineering, Korea Advanced Institute of Science and Technology (KAIST), 291 Daehak-ro, Yuseong-gu, Daejeon 34141, Korea.

<sup>4</sup>Department of Basic Sciences, College of Applied Sciences, A'Sharqiyah University, Ibra 400, Oman

<sup>5</sup>Department of Bio-chemical and Polymer engineering, Chosun University, 309 Pilmun-daero, Dong-gu, Gwangju 501-759, Korea.

<sup>†</sup>These authors contributed equally to this work

\*Corresponding Author. E-mail: jslee@gist.ac.kr

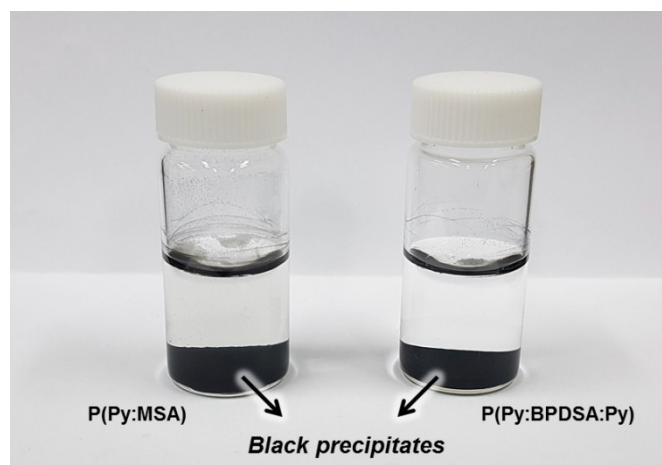

**Fig. S1** Photographs of precipitated P(Py:MSA) and P(Py:BPDSA:Py). Black precipitates were obtained on the bottom of reactors.

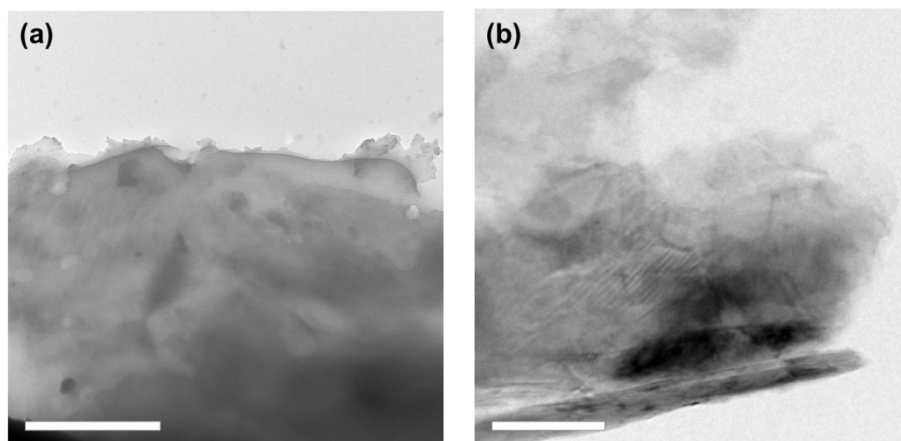

**Fig. S2** (a) TEM micrographs at a low magnification of P(Py:MSA) and (b) P(Py:BPDSA:Py). Scale bar, 1  $\mu\text{m}$ . Bulk aggregations were observed without 2D graphene oxide templates.

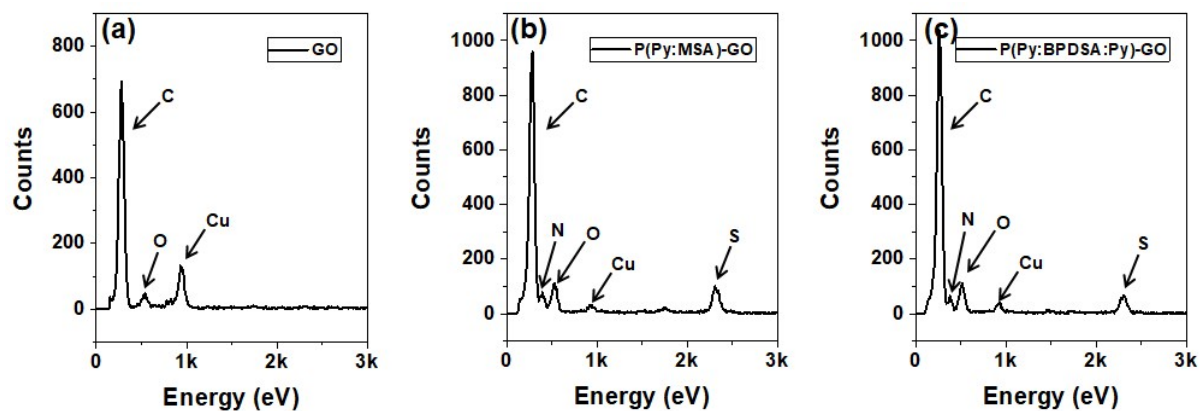

**Fig. S3** EDS graphs of GO and composites. (a) GO, (b) P(Py:MSA)-GO. (c) P(Py:BPDSA:Py)-GO. The EDS was measured at the same region with each TEM image in Figure 2a-c. N and S elements detected in the composites were only from Py units and sulfonic acids of the *in situ* synthesized polymers on GO. Cu peaks were detected from copper TEM grids.

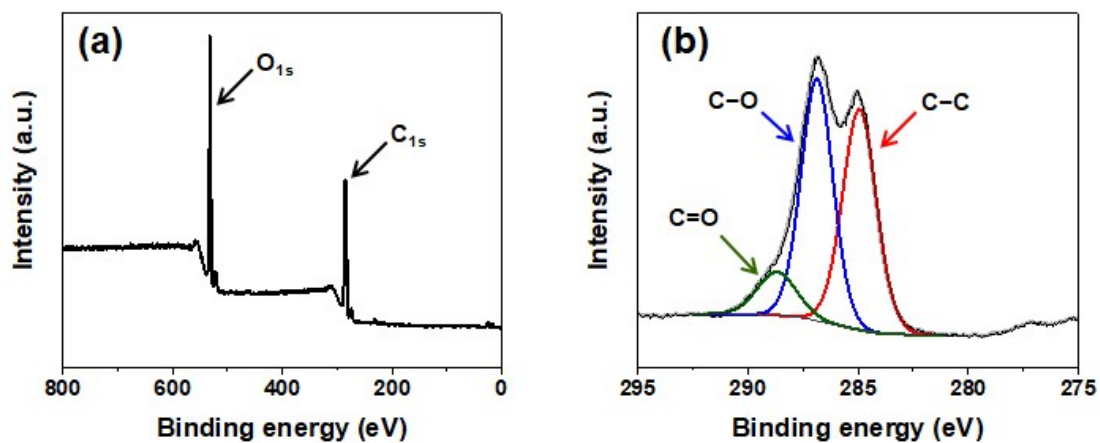

**Fig. S4** XPS spectra of GO. (a) Full spectrum. (b)  $C_{1s}$  signals. GO composed of only C and O (atomic percent, 68.15 and 31.85 %, respectively). In  $C_{1s}$  signals, three components were observed for C-C (284.9 eV), C-O (286.8 eV) and C=O (288.6 eV).<sup>1</sup>

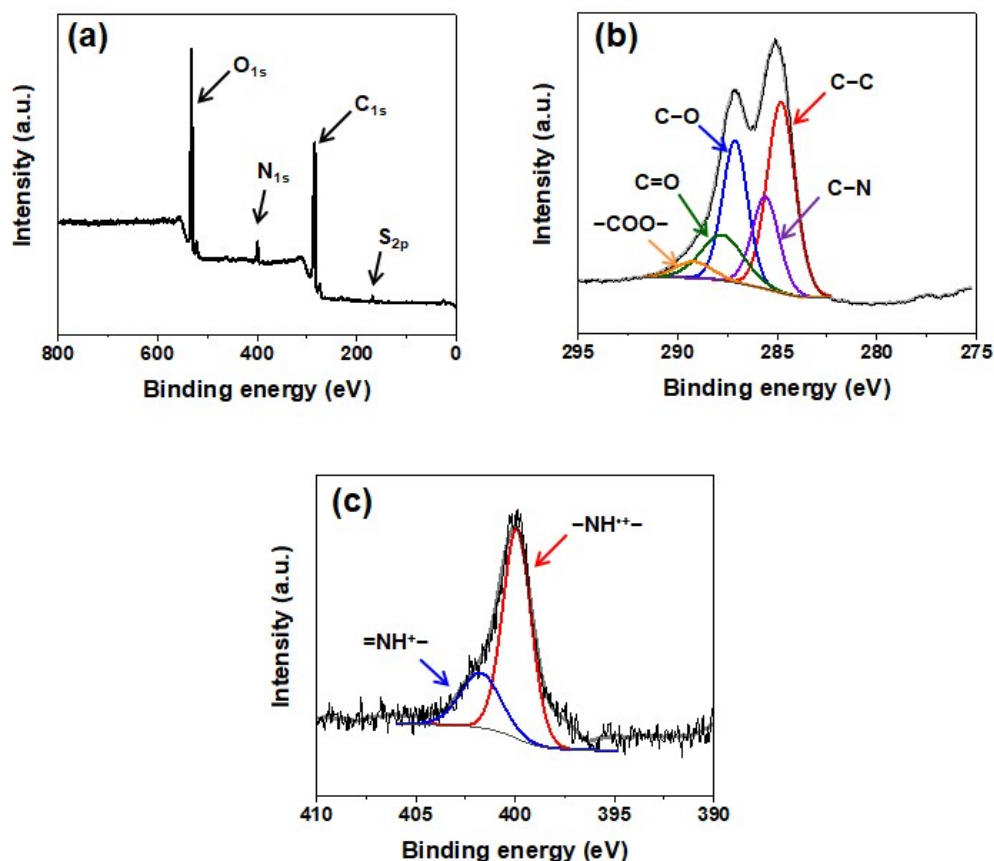

**Fig. S5** XPS spectra of P(Py:MSA)-GO. (a) Full spectra. (b) C<sub>1s</sub> signals. (c) N<sub>1s</sub> signals. P(Py:MSA)-GO composed of C, O, N and S elements (Atomic percent, 69.5, 25.0, 4.3 and 1.2 %, respectively). In C<sub>1s</sub> signals, five components were observed for C-C (284.8 eV), C-N (285.6 eV), C-O (287.1 eV), C=O (287.8 eV) and -COO- (289.2 eV).<sup>1</sup> The N<sub>1s</sub> signals show mostly the charged nitrogen components at 400.0 and 401.7 eV, which correspond to -NH<sup>+-</sup> and =NH<sup>+-</sup>, respectively.<sup>1, 2</sup> The positively charged nitrogen was formed by ionic interaction with sulfonic acid groups of MSA.

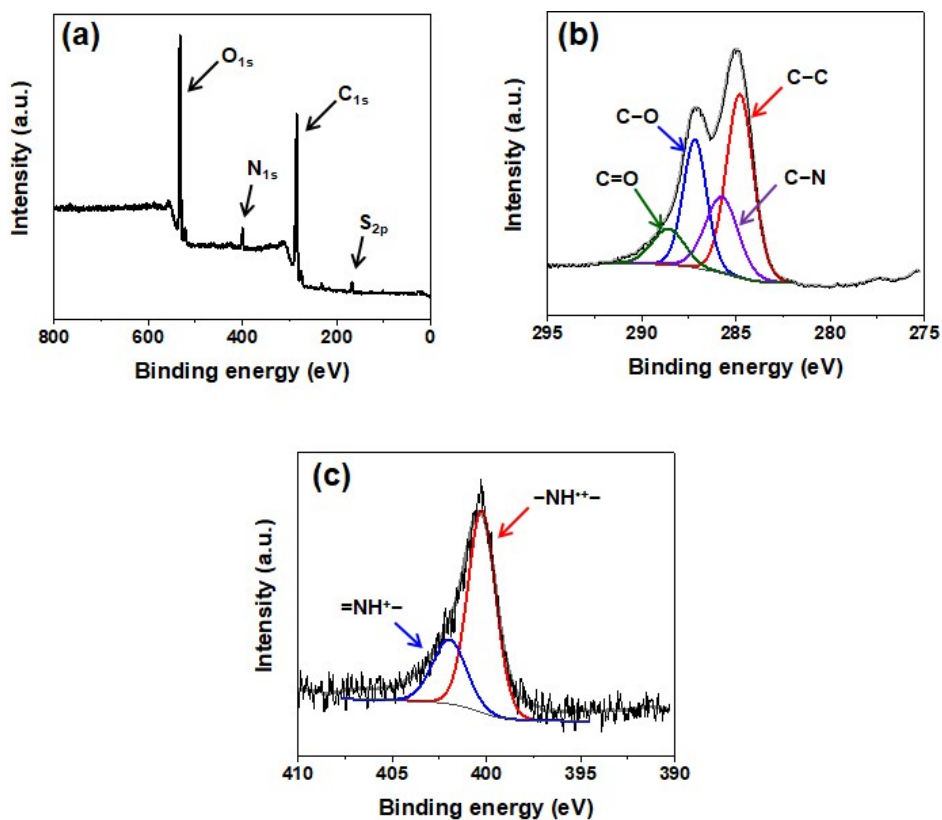

**Fig. S6** XPS spectra of P(Py:BPDSA:Py)-GO. (a) Full spectrum (b) C<sub>1s</sub> signals. (c) N<sub>1s</sub> signals. Similar to the composites of P(Py:MSA)-GO, P(Py:BPDSA:Py)-GO composed of C, O, N and S elements (Atomic percent, 69.8, 24.1, 4.0 and 2.1 %, respectively). In C<sub>1s</sub> signals, four components also were observed for C-C (284.8 eV), C-N (285.8 eV), C-O (287.1 eV) and C=O (288.6 eV).<sup>1</sup> The N<sub>1s</sub> signals show the charged nitrogen components at 400.2 and 401.9 eV, corresponding to -NH<sup>+</sup>- and =NH<sup>+</sup>-, respectively.<sup>1, 2</sup> The positively charged nitrogen was made by ionic interaction with sulfonic acid groups of BPDSA connectors.

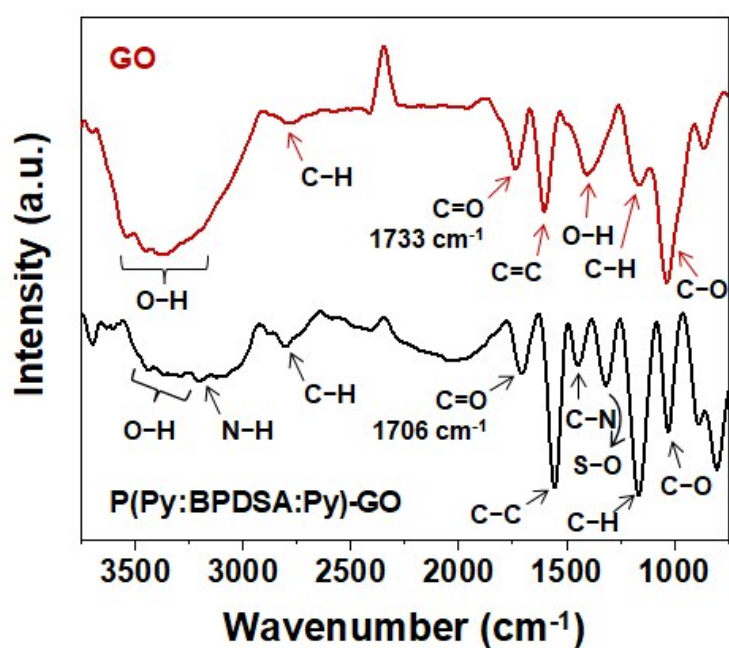

**Fig. S7** FT-IR spectra of GO and P(Py:BPDSA:Py)-GO. In the spectrum of GO, a strong and broad absorption is observed at near 3300  $\text{cm}^{-1}$ , which is attributed to the vibration of O-H.<sup>3</sup> Also, the spectrum shows the stretching and bending of C-H (2805 and 1162  $\text{cm}^{-1}$ ) and a graphitic C=C (1602  $\text{cm}^{-1}$ ).<sup>3</sup> In the spectrum of P(Py:BPDSA:Py)-GO composite, the characteristic peaks of PPy with sulfonate groups were observed such as the stretching vibration of N-H (3208  $\text{cm}^{-1}$ ), C-N (1440  $\text{cm}^{-1}$ ), and S-O (1317  $\text{cm}^{-1}$ ).<sup>3, 4</sup> The most important phenomena in these two spectra are that the stretching vibration of C=O is shifted from 1733 (GO) to 1706  $\text{cm}^{-1}$  (composite), demonstrating the existence of strong hydrogen bonding between polymer and GO.<sup>1</sup>

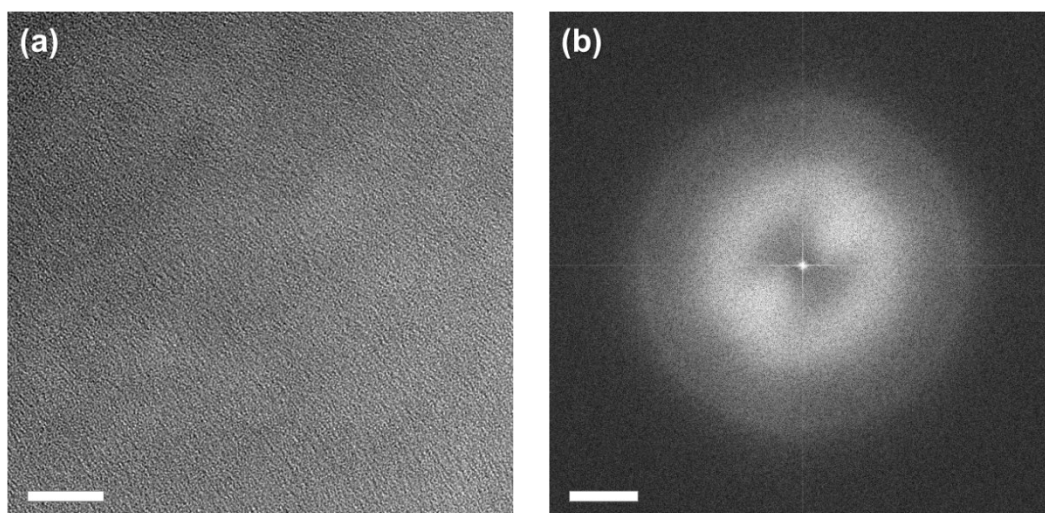

**Fig. S8** (a) HRTEM image of P(Py:MSA)-GO. (b) The corresponding FFT pattern image of (a).

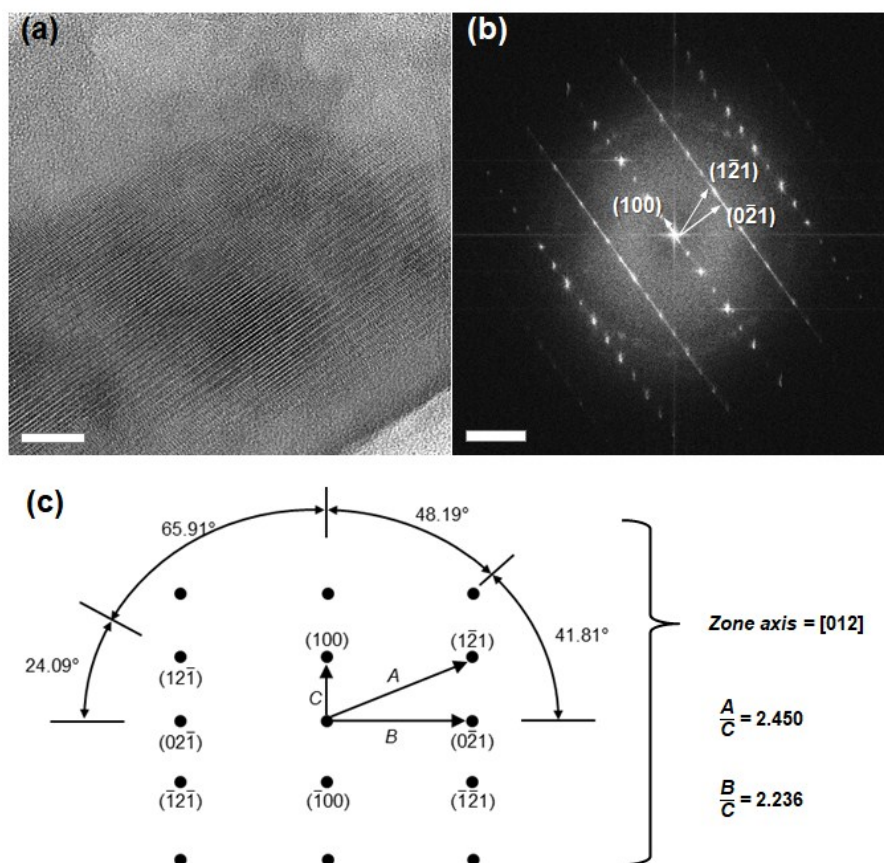

**Fig. S9** Crystal structure analysis. (a) HRTEM and (b) FFT pattern image of P(Py:BPDSA:Py)-GO. Scale bars, 10 nm, and  $2 \text{ nm}^{-1}$ , respectively. (c) Theoretical spots of the electron diffraction pattern along [012] zone axis.

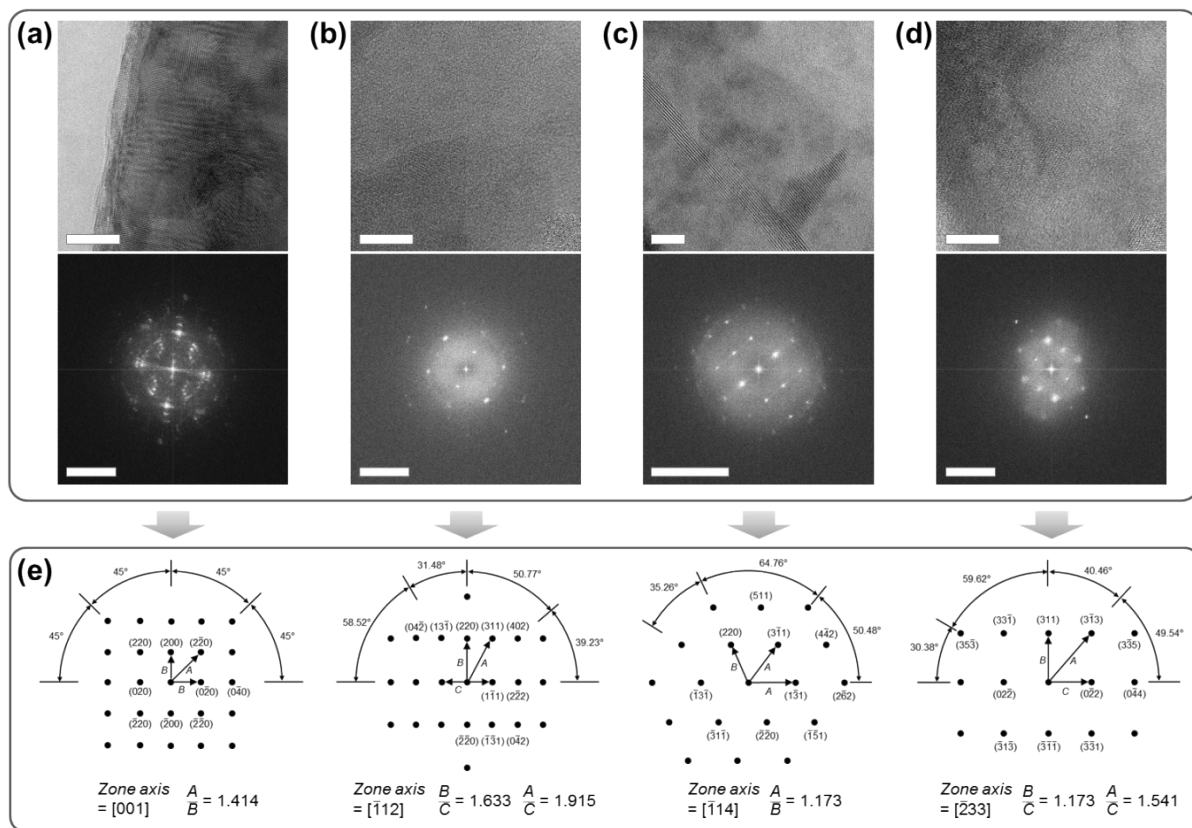

**Fig. S10** HRTEM and FFT images of P(Py:BPDSA:Py)-GO measured along different zone axes. (a) [001] direction; (b) [-112] direction; (c) [-114] direction; (d) [-233] direction. Scale bars, 10 nm, and 5 nm<sup>-1</sup> (for HRTEM and FFT pattern images, respectively). (e) Theoretical spots of electron diffraction patterns of the FCC structure. Several zone axes were slightly tilted due to the mobility of graphene oxide sheets during measuring. However, the information of all lattices is almost similar to their theoretical values.

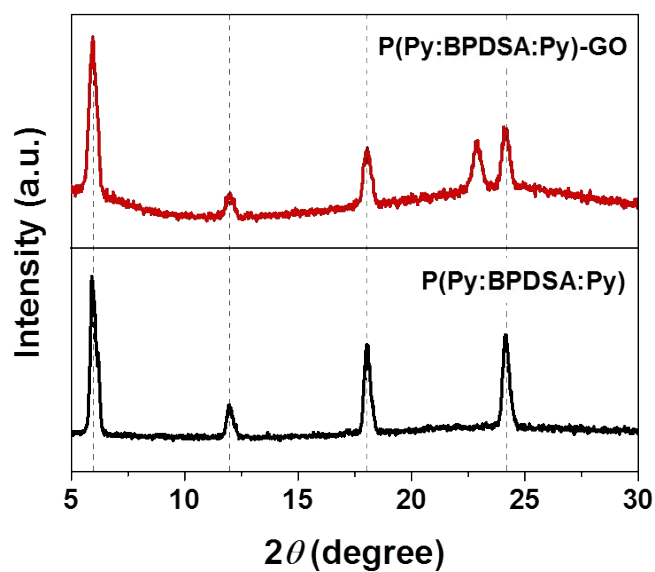

**Fig. S11** XRD spectra of P(Py:BPDSA:Py)-GO and pure P(Py:BPDSA:Py). The crystalline characteristic peaks of P(Py:BPDSA:Py)-GO corresponds to those of pure P(Py:BPDSA:Py) having the  $d$  spacings in the [100] direction.

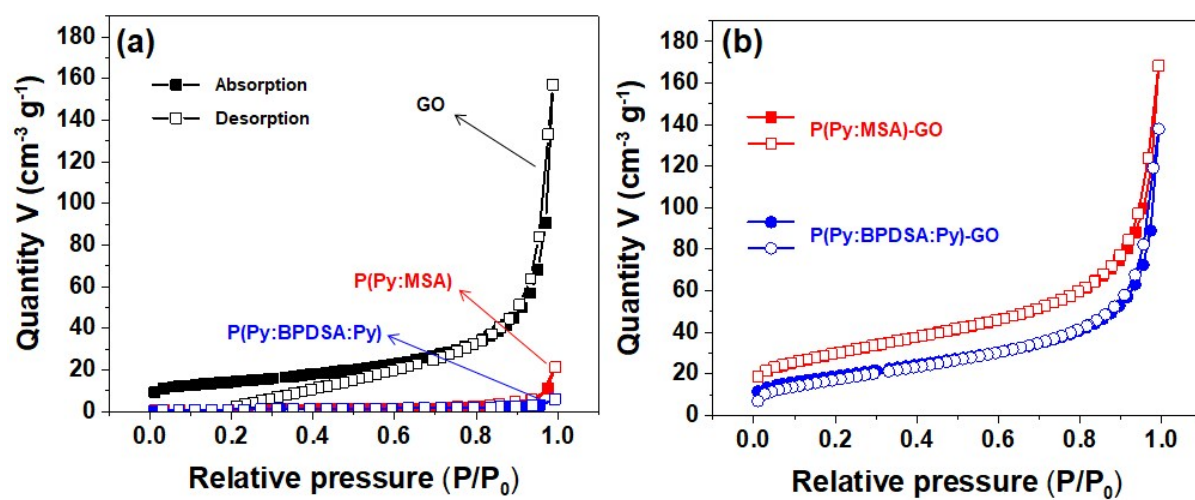

**Fig. S12** N<sub>2</sub> adsorption/desorption isotherms: (a) GO, P(Py:MSA) and P(Py:BPDSA:Py). (b) P(Py:MSA)-GO and P(Py:BPDSA:Py)-GO.

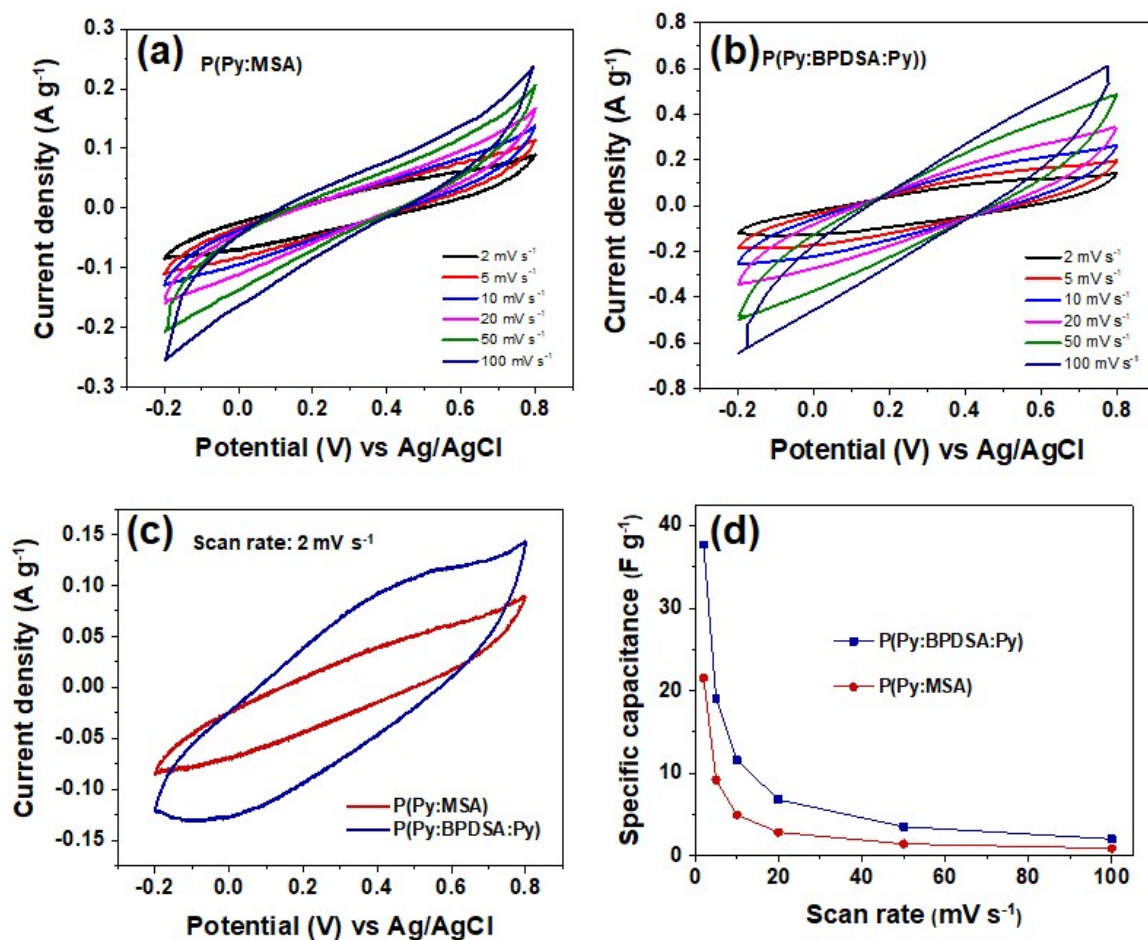

**Fig. S13** Electrochemical performance of P(Py:MSA) and P(Py:BPDSA:Py). CV curves of P(Py:MSA) (a) and P(Py:BPDSA:Py), (b) at various scan rates, (c) CV curves of P(Py:MSA) and P(Py:BPDSA:Py) at a scan rate of 2  $\text{mV s}^{-1}$ , and (d) specific capacitances of P(Py:MSA) and P(Py:BPDSA:Py) at various scan rates.

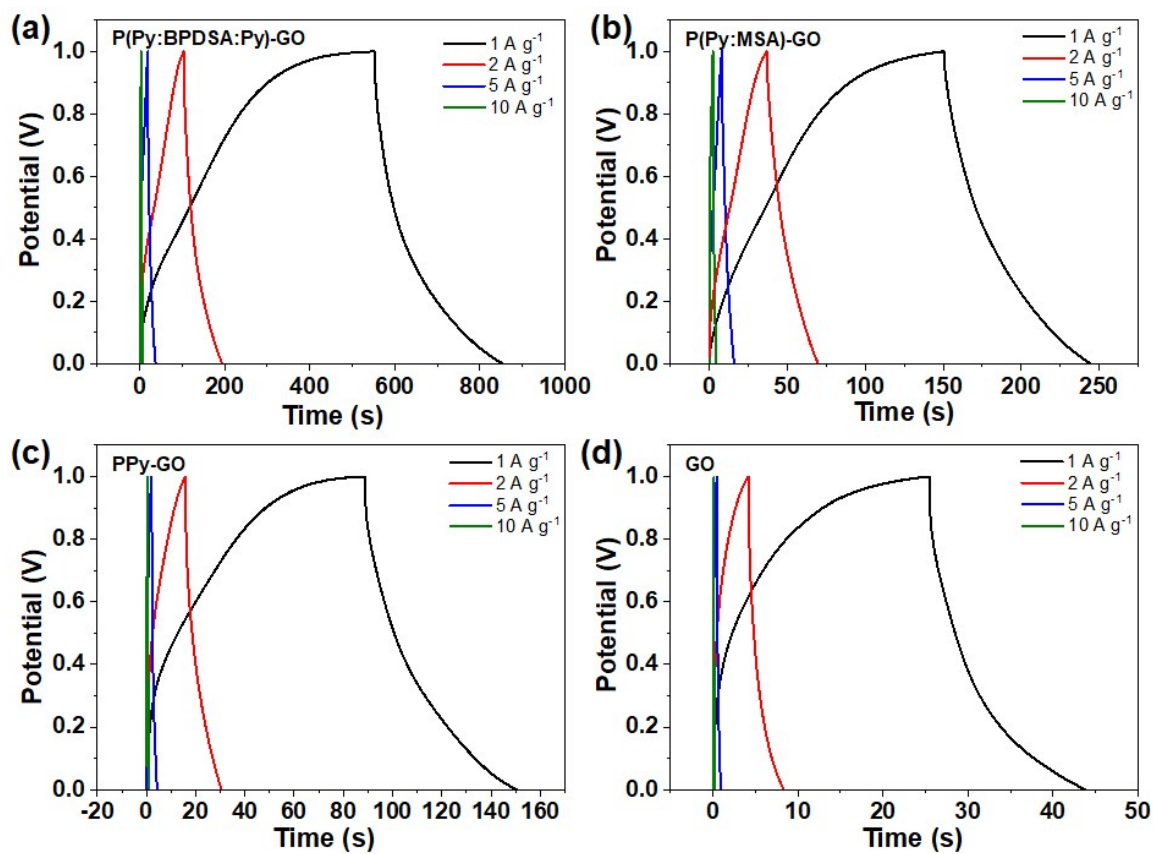

**Fig. S14** Galvanostatic charge/discharge curves of (a) P(Py:BPDSA:Py)-GO, (b) P(Py:MSA)-GO, (c) PPy-GO and GO at various current density.

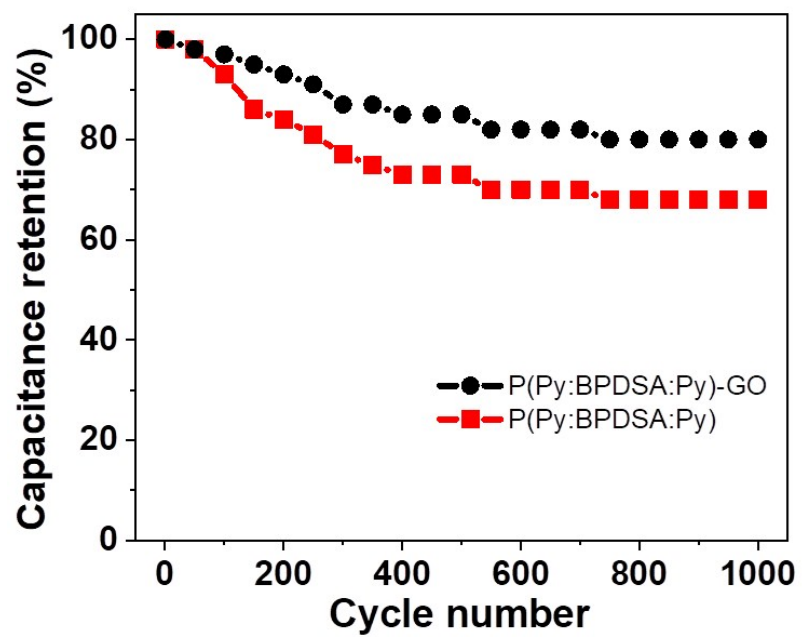

**Fig. S15** Cyclic stability of P(Py:BPDSA:Py)-GO and P(Py:BPDSA:Py) for 1000 cycles at a scan rate of  $10 \text{ mV s}^{-1}$ .

**Table S1.** The capacitance of the similar materials reported in the literature.

| Active material                  | Electrolyte                         | Scan rate<br>or current density | Specific<br>capacitance<br>(F g <sup>-1</sup> ) | Reference |
|----------------------------------|-------------------------------------|---------------------------------|-------------------------------------------------|-----------|
| P(Py:BPDSA:Py)/Graphene oxide    | 1 M H <sub>2</sub> SO <sub>4</sub>  | 2 mV s <sup>-1</sup>            | 480                                             | This work |
| PPy/Graphene                     | 1 M H <sub>2</sub> SO <sub>4</sub>  | 2 mV s <sup>-1</sup>            | 318                                             | 5         |
| PPy/Graphene                     | 3 M KCl                             | 0.2 A g <sup>-1</sup>           | 255                                             | 6         |
| Free-standing PPy/Graphene       | 1 M KCl                             | 3 mA                            | 278                                             | 7         |
| PPy/rGO                          | 1 M Li <sub>2</sub> SO <sub>4</sub> | 5 mV s <sup>-1</sup> ,          | 114                                             | 8         |
| PPy/rGO                          | 3 M KCl                             | 0.2 A g <sup>-1</sup>           | 290                                             | 9         |
| PPy/rGO-CTAB                     | 1 M H <sub>2</sub> SO <sub>4</sub>  | 0.5 A g <sup>-1</sup>           | 324                                             | 10        |
| PPy/Sulfonated graphene          | 1 M H <sub>2</sub> SO <sub>4</sub>  | 1 A g <sup>-1</sup>             | 360                                             | 11        |
| PPy/Graphene foam                | 3 M NaClO <sub>4</sub>              | 1.5 A g <sup>-1</sup>           | 350                                             | 12        |
| PPy nanofiber/Graphene           | 1 M Li <sub>2</sub> SO <sub>4</sub> | 0.5 A g <sup>-1</sup>           | 161                                             | 13        |
| PPy/N-doped graphene             | 6M KOH                              | 2 mV s <sup>-1</sup> .          | 393                                             | 14        |
| PPy/Holy-GO                      | 1M KOH                              | 0.2 A g <sup>-1</sup>           | 418                                             | 15        |
| Polyaniline/Graphene             | 1 M H <sub>2</sub> SO <sub>4</sub>  | 1 A g <sup>-1</sup>             | 452                                             | 16        |
| Polyaniline/Graphene/polyaniline | 1 M H <sub>2</sub> SO <sub>4</sub>  | 0.5 A g <sup>-1</sup>           | 384                                             | 17        |
| Polyaniline/rGO                  | 1 M H <sub>2</sub> SO <sub>4</sub>  | 0.45 A g <sup>-1</sup>          | 431                                             | 18        |

## References

1. J. Cao, Y. Wang, J. Chen, X. Li, F. C. Walsh, J.-H. Ouyang, D. Jia and Y. Zhou, *J. Mater. Chem. A*, 2015, **3**, 14445-14457.
2. L. Atanasoska, K. Naoi and W. H. Smyrl, *Chem. mater.*, 1992, **4**, 988-994.
3. P. Patnaik and J. A. Dean, *Dean's analytical chemistry handbook*, McGraw-Hill, 2004.
4. H.-J. Lee, Y.-R. Jo, S. Kumar, S. J. Yoo, J.-G. Kim, Y.-J. Kim, B.-J. Kim and J.-S. Lee, *Nat. Commun.*, 2016, **7**, 12803.
5. C. Xu, J. Sun and L. Gao, *J. Mater. Chem.*, 2011, **21**, 11253-11258.
6. J. Zhu, Y. Xu, J. Wang, J. Wang, Y. Bai and X. Du, *Phys. Chem. Chem. Phys.*, 2015, **17**, 19885-19894.
7. H. P. De Oliveira, S. A. Sydlik and T. M. Swager, *The Journal of Physical Chemistry C*, 2013, **117**, 10270-10276.
8. C. Zhao, K. Shu, C. Wang, S. Gambhir and G. G. Wallace, *Electrochim. Acta*, 2015, **172**, 12-19.
9. J. Zhu and Y. Xu, *Electrochim. Acta*, 2018, **265**, 47-55.
10. X. Fan, Z. Yang and N. He, *RSC Advances*, 2015, **5**, 15096-15102.
11. C. Bora, J. Sharma and S. Dolui, *The Journal of Physical Chemistry C*, 2014, **118**, 29688-29694.
12. Y. Zhao, J. Liu, Y. Hu, H. Cheng, C. Hu, C. Jiang, L. Jiang, A. Cao and L. Qu, *Advanced materials*, 2013, **25**, 591-595.
13. K. Shu, Y. Chao, S. Chou, C. Wang, T. Zheng, S. Gambhir and G. G. Wallace, *ACS Appl. Mater. Interfaces*, 2018, **10**, 22031-22041.
14. L. Lai, L. Wang, H. Yang, N. G. Sahoo, Q. X. Tam, J. Liu, C. K. Poh, S. H. Lim, Z. Shen and J. Lin, *Nano Energy*, 2012, **1**, 723-731.
15. Y. He, Y. Bai, X. Yang, J. Zhang, L. Kang, H. Xu, F. Shi, Z. Lei and Z.-H. Liu, *J. Power Sources*, 2016, **317**, 10-18.
16. S. Gao, P. Zang, L. Dang, H. Xu, F. Shi, Z. Liu and Z. Lei, *J. Power Sources*, 2016, **304**, 111-118.
17. Z. Tong, Y. Yang, J. Wang, J. Zhao, B.-L. Su and Y. Li, *J. Mater. Chem. A*, 2014, **2**, 4642-4651.
18. M. Kim, C. Lee and J. Jang, *Adv. Funct. Mater.*, 2014, **24**, 2489-2499.
